1 **Title:**

2 Signatures of transmission in within-host *M. tuberculosis* variation

3

4 **Authors**

5 Katharine S. Walter<sup>1</sup>, Ted Cohen<sup>2</sup>, Barun Mathema<sup>3</sup>, Caroline Colijn<sup>4</sup>, Benjamin Sobkowiak<sup>2</sup>, Iñaki

6 Comas<sup>5</sup>, Galo A. Goig<sup>6,7</sup>, Julio Croda<sup>2,8,9</sup>, Jason R. Andrews<sup>10</sup>

7

8 1. Division of Epidemiology, University of Utah, Salt Lake City, UT 84105

9 2. Department of Epidemiology of Microbial Diseases, Yale School of Public Health, New Haven,

10 USA

11 3. Department of Epidemiology, Columbia University Mailman School of Public Health; New

12 York, United States.

13 4. Department of Mathematics, Simon Fraser University; Burnaby, Canada.

14 5. Institute of Biomedicine of Valencia (CSIC), Valencia, Spain

15 6. Swiss Tropical and Public Health Institute, Allschwil, Switzerland.

16 7. University of Basel, Basel, Switzerland.

17 8. Federal University of Mato Grosso do Sul - UFMS, Campo Grande, MS, Brazil

18 9. Oswaldo Cruz Foundation Mato Grosso do Sul, Mato Grosso do Sul, Brazil

19 10. Division of Infectious Diseases and Geographic Medicine, Stanford University School of

20 Medicine, Stanford, CA, USA

21

22

23

24 **Abstract**

25 **Background.**

26 Because *M. tuberculosis* evolves slowly, transmission clusters often contain multiple individuals with  
27 identical consensus genomes, making it difficult to reconstruct transmission chains. Finding additional  
28 sources of shared *M. tuberculosis* variation could help overcome this problem. Previous studies have  
29 reported *M. tuberculosis* diversity within infected individuals; however, whether within-host variation  
30 improves transmission inferences remains unclear.

31

32 **Methods.**

33 To evaluate the transmission information present in within-host *M. tuberculosis* variation, we re-analyzed  
34 publicly available sequence data from three household transmission studies, using household membership  
35 as a proxy for transmission linkage between donor-recipient pairs.

36

37 **Findings.**

38 We found moderate levels of minority variation present in *M. tuberculosis* sequence data from cultured  
39 isolates that varied significantly across studies (mean: 6, 7, and 170 minority variants above a 1% minor  
40 allele frequency threshold, outside of PE/PPE genes). Isolates from household members shared more  
41 minority variants than did isolates from unlinked individuals in the three studies (mean 98 shared  
42 minority variants vs. 10; 0.8 vs. 0.2, and 0.7 vs. 0.2, respectively). Shared within-host variation was  
43 significantly associated with household membership (OR: 1.51 [1.30,1.71], for one standard deviation  
44 increase in shared minority variants). Models that included shared within-host variation improved the  
45 accuracy of predicting household membership in all three studies as compared to models without within-  
46 host variation (AUC: 0.95 *versus* 0.92, 0.99 *versus* 0.95, and 0.93 *versus* 0.91).

47

48 **Interpretation.**

49 Within-host *M. tuberculosis* variation persists through culture and could enhance the resolution of  
50 transmission inferences. The substantial differences in minority variation recovered across studies  
51 highlights the need to optimize approaches to recover and incorporate within-host variation into  
52 automated phylogenetic and transmission inference.

53

#### 54 **Funding**

55 NIAID: 5K01AI173385

56

#### 57 **Keywords**

58 *M. tuberculosis*, genomics, epidemiology, transmission

## 59 **Introduction**

60

61 Reducing the global burden of tuberculosis urgently requires reducing the number of incident *M.*  
62 *tuberculosis* infections. Yet the long and variable latency period of TB infection makes it challenging to  
63 identify sources of transmission and thus intervene. Genomic epidemiology approaches have been  
64 powerfully applied to characterize *M. tuberculosis* global phylogenetic structure, migration and gene  
65 flow, patterns of antibiotic resistance, transmission linkages. Yet transmission inference approaches have  
66 often failed to identify the majority of transmission linkages in high-incidence settings<sup>1-6</sup>. Further, while  
67 previous studies have identified heterogeneity in the number of secondary cases generated by infectious  
68 individuals<sup>7</sup> and risk factors for onwards transmission<sup>8,9</sup>, these are often difficult to generalize. Many  
69 critical questions, including the contribution of asymptomatic individuals to transmission, remain  
70 unanswered. Novel, accessible approaches to reconstruct high-resolution transmission patterns are  
71 urgently needed so that public health programs can identify environments driving transmission and risk  
72 factors for onwards transmission.

73 Commonly used approaches for *M. tuberculosis* transmission inference use single consensus  
74 genomes, representing the sequence of the most frequent alleles, from infected individuals. Closely  
75 related pathogen genomes are predicted to be more closely linked in transmission chains. For example, *M.*  
76 *tuberculosis* consensus sequences within a given genetic distance<sup>10-13</sup> are considered clustered and  
77 potentially epidemiologically linked. However, *M. tuberculosis* evolves at a relatively slow rate<sup>14</sup>. The  
78 result is that there may be limited diversity in outbreaks. Indeed, several genomic epidemiology studies  
79 reported that multiple individuals harbored identical *M. tuberculosis* genomes<sup>13,15-17</sup>, making it difficult to  
80 reconstruct who infected whom. This highlights a need to recover more informative variation from  
81 pathogen genomes. This challenge is not unique to *M. tuberculosis*—COVID-19 outbreak investigations  
82 frequently generate large numbers of identical genomes<sup>18</sup>, indicating a broad need for higher-resolution  
83 pathogen genomics approaches.

84 Population-level bacterial diversity within an individual, or within-host heterogeneity, can be  
85 attributed to mixed infections, infections with more than one distinct *M. tuberculosis* genotype, or *de*  
86 *novo* evolution, mutations that are introduced over the course of an individual's infection<sup>19</sup>. Previous  
87 research has found that a substantial proportion (10-20%)<sup>19</sup> of infected individuals harbor mixed  
88 infections with genetically diverse populations of *M. tuberculosis*<sup>19-23</sup>. A portion of within-host  
89 heterogeneity is likely transmitted onwards<sup>24,25</sup> and therefore, within-host diversity captures potentially  
90 valuable epidemiological information about transmission history<sup>25,26</sup>. Complex infections are also  
91 important clinically. Within-host heterogeneity is associated with poor treatment outcomes<sup>20,27</sup> and hetero-  
92 resistance, the presence of both resistant and susceptible alleles within a single infection, reduces the  
93 accuracy of diagnostics for antibiotic resistance<sup>27</sup>.

94 Despite the evidence that within-host *M. tuberculosis* variation is common, there are many open  
95 questions about whether shared within-host variation is a predictor of transmission linkage and, more  
96 practically, how to recover this level of variation and incorporate it into transmission inferences.  
97 Currently, *M. tuberculosis* is most frequently cultured from sputum samples and sequenced with short  
98 reads to generate a single consensus sequence<sup>28</sup>. This limits the variation recovered because (a) culture  
99 imposes a severe bottleneck<sup>29-31</sup>; (b) within-host variation, including mixed infections, are often excluded,  
100 in part due to a lack of validated methodological approaches for accurate recovery of such variation<sup>25,31</sup>;  
101 and (c) repetitive genomic regions, including the PE/PPE gene families, among the most variant-rich and  
102 potentially informative regions of the genome, are excluded<sup>32-34</sup>.

103 Recent work has demonstrated that pathogen enrichment approaches—through either host DNA  
104 depletion or pathogen DNA enrichment—can allow *M. tuberculosis* to be sequenced directly from clinical  
105 samples, bypassing the need for culture<sup>23,35-39</sup>. But there have not been consistent findings about whether  
106 culture-free approaches improve the detection of within-host variation.

107 *M. tuberculosis* transmission is never directly observed, making it difficult to assess the  
108 performance of genomic methods in identifying true transmission pairs. We therefore tested whether  
109 household members—as a proxy for epidemiologically linked individuals—shared more minority variants

110 than did unlinked individuals, and whether minority variation could enhance transmission inferences by  
111 re-analyzing previously published household transmission studies.

112 Here, we study household members as a gold standard, the best available proxy for transmission  
113 pairs, to test whether shared minority *M. tuberculosis* variation may augment fixed genomic differences in  
114 reconstructing epidemiological linkages. In practice, such as in routine population-wide genomic *M.*  
115 *tuberculosis* sequencing by public health laboratories, epidemiological linkages are frequently unknown.  
116 Whether a signal of shared minority variation exists in gold standard transmission pairs can then indicate  
117 whether shared minority variation might contribute to resolving such unobserved transmission linkages in  
118 population-wide genomic data.

119

## 120 **Methods**

121

### 122 *Sequence and epidemiological data*

123 We accessed publicly available data from 3 household transmission studies for which both raw  
124 sequence data and epidemiological linkages were publicly available: Colangeli et al. (2020)<sup>40</sup>, Vitória,  
125 Brazil; Guthrie et al. (2018)<sup>41</sup>, British Columbia, Canada; and Walker et al. 2014, Oxfordshire, England<sup>11</sup>  
126 (Table 1). Sequence data was available from the Sequence Read Archive (PRJNA475130,  
127 PRJNA413593, and PRJNA549270). Colangeli et al. cultured sputa on Lowenstein-Jensen (LJ) slants,  
128 plated cultures on Middlebrook 7H10 agar, and then scraped three loops of culture for DNA extraction<sup>40</sup>.  
129 Both Guthrie et. al and Walker et al. re-cultured frozen isolates on MGIT liquid medium or LJ slants<sup>11,41</sup>.  
130 We accessed information on household pairs from published phylogenies in the Colangeli et al. and  
131 Guthrie et al. papers. For the Walker et al. paper, household linkages were available in the data  
132 supplement.

133

### 134 *Bioinformatic analysis*

135 We processed raw sequence data with a previously described variant identification pipeline  
136 available on GitHub (<https://github.com/ksw9/mtb-call2>).<sup>40,42</sup> We previously conducted a variant  
137 identification experiment to compare commonly used mapping and variant calling algorithms in *M.*  
138 *tuberculosis* genomic epidemiology<sup>32</sup>. We found that the combination of the *bwa*<sup>43</sup> mapping algorithm  
139 and *GATK*<sup>44,45</sup> variant caller routinely minimizes false positive variant calls with minimal cost to  
140 sensitivity as compared to other tool combinations<sup>46</sup>, especially when the PE/PPE genes are excluded. We  
141 therefore used this combination of tools in our pipeline.

142 Briefly, we trimmed low-quality bases (Phred-scaled base quality < 20) and removed adapters  
143 with Trim Galore v. 0.6.5 (stringency=3)<sup>47</sup>. We used CutAdapt v.4.2 to further filter reads (--nextseq-  
144 trim=20 --minimum-length=20 --pair-filter=any)<sup>48</sup>. To exclude potential contamination which a previous  
145 study shows can be a source of false genetic variation<sup>49</sup>, we used Kraken2 to taxonomically classify reads  
146 and remove reads that were not assigned to the *Mycobacterium* genus or that were assigned to a  
147 *Mycobacterium* species other than *M. tuberculosis*<sup>50</sup>. We mapped reads with *bwa* v. 0.7.15 (*bwa mem*)<sup>43</sup>  
148 to the H37Rv reference genome (NCBI Accession: NC\_000962.3  
149 [[https://www.ncbi.nlm.nih.gov/nuccore/NC\\_000962.3](https://www.ncbi.nlm.nih.gov/nuccore/NC_000962.3)]) and removed duplicates with sambamba<sup>51</sup>. We  
150 called variants with *GATK* 4.1 HaplotypeCaller<sup>44</sup>, setting sample ploidy to 1, and GenotypeGVCFs,  
151 including non-variant sites in output VCF files. We included variant sites with a minimum depth of 5X  
152 and a minimum variant quality score 20 and constructed consensus sequences with *bcftools consensus*<sup>52</sup>,  
153 excluding indels. We flagged SNPs in previously defined repetitive regions (PPE and PE-PGRS genes,  
154 phages, insertion sequences and repeats longer than 50 bp)<sup>53</sup> and excluded these variants in figures and  
155 statistics except when otherwise noted. We identified sub-lineage and evidence of mixed infection with  
156 *TBProfiler* v.4.2.0<sup>54,55</sup>.

157 We constructed full-length consensus FASTA sequences from VCF files, setting missing  
158 genotypes to missing, and used *SNP-sites* to extract a multiple alignment of internal variant sites only<sup>56</sup>.  
159 We used the R package *ape* to measure pairwise differences between samples (*dist.dna*,  
160 *pairwise.deletion=TRUE*)<sup>57</sup>. We selected a best fit substitution model with *ModelFinder*<sup>58</sup>, implemented

161 in IQ-TREE multicore version 2.2.0<sup>59</sup>, evaluating all models that included an ascertainment bias  
162 correction for the use of an alignment of SNPs only. We then fit a maximum likelihood tree with IQ-  
163 TREE, with 1000 ultrafast bootstrap replicates<sup>59,60</sup> to visualize the location of household pairs in the  
164 context of study-wide variation.

165 We filtered variants that had coverage higher or lower than two standard deviations from the  
166 sample mean depth, reasoning that the extreme coverage was a result of incorrect mapping. We  
167 considered minority variants as positions with two or more alleles each supported by at least 5X coverage  
168 at the same position, at first, without filtering by minor allele frequency threshold. To examine the impact  
169 of filtering approach on the informativeness of minority variation, we applied increasingly conservative  
170 minor allele thresholds, from 0.05% to 50%. We quantified the number of per-sample minority variants;  
171 the number of shared minority variants between household members, defined as sharing the same minor  
172 allele call at the same position; and the number of shared minority variants between epidemiologically  
173 unrelated pairs.

174 Following variant identification, all analyses were conducted in R version 4.2.2. All analysis  
175 scripts are available on GitHub (<https://github.com/ksw9/mtb-within-host>).

176

### 177 **Role of the funding source**

178 The study sponsor played no role in study design; in the collection, analysis, and interpretation of data; in  
179 the writing of the report; and in the decision to submit the paper for publication.

180

## 181 **Results**

182

### 183 *M. tuberculosis* variation observed in household transmission studies.

184 To characterize the epidemiological information held in within-host *M. tuberculosis* variation  
185 present in routinely generated Illumina sequence data from cultured isolates, we reanalyzed sequence data  
186 from three previously published *M. tuberculosis* transmission studies for which whole genome



187 sequencing data and epidemiological linkages were publicly available. Studies were from different  
188 epidemiological settings and included (a) a household transmission study in Vitória, Brazil<sup>40</sup> (Colangeli et  
189 al.), a retrospective population-based study of pediatric tuberculosis in British Columbia, Canada<sup>41</sup>  
190 (Guthrie et al.), and (c) a retrospective population-based study in Oxfordshire, England<sup>11</sup> (Walker et al.).  
191 Study design, sampling design, and culture and sequencing methods differed across studies (Table 1).

192 As reported in the original studies, we observed limited fixed variation between *M. tuberculosis*  
193 consensus sequences from isolates collected within the same household or among isolates from patients  
194 with epidemiological linkages compared to randomly selected pairs of sequences from the same population  
195 (Fig. 1a). Consensus *M. tuberculosis* sequences from epidemiologically linked individuals were  
196 phylogenetic nearest neighbors for each study (Fig. 1b). However, genetic distances between consensus  
197 sequences often exceeded commonly used 5 and 12 SNP thresholds<sup>10,11</sup> for classifying isolates as  
198 potentially linked in transmission, with 44.4% (20/45) of household pairs not meeting a 5-SNP threshold  
199 and 15.6% (7/45) of household pairs not meeting a 12-SNP threshold (Fig. 1a). Twenty-four percent  
200 (11/45) of isolate pairs from epidemiologically linked individuals were within a genetic distance of 2  
201 SNPs or less, underscoring that genomic distances alone may be limited in their resolution.

202

203 *Within-host variation observed in routine, culture-based M. tuberculosis sequencing data.*

204 We quantified minority variation within samples as the number of positions with a minor allele  
205 above a frequency of a range of threshold values, as we were interested in tradeoffs between sensitivity  
206 and specificity of variant detection. We detected limited, but measurable, minority variation above a 1%  
207 minor allele frequency threshold, with a disproportionate number of minority variants occurring within  
208 the PE/PPE genes (24.8%, 82.2%, and 80.1% of all minority variants, across the studies) (Fig. 2). We  
209 found substantial differences in minority variation detected across studies with the Colangeli et al. study  
210 (median: 160 minority variants, IQR:130-220) identifying a higher level of minority variation than both  
211 the Guthrie et al. study (median: 3, IQR:1-8; Wilcoxon test,  $p < 0.005$ ) and the Walker et al. study  
212 (median: 2, IQR: 1-4,  $p < 0.005$ ) (Table 3).

213 Most minority variants were in unique genomic locations and no minority variant was found in  
214 more than 5 samples in a single study (Fig. S1). About half of minority variants were predicted to be  
215 missense variants (50.0%; 964/1929) and only 1.3% (25/1929) minority variants were stop mutations,  
216 which would generate a truncated protein. However, the 5 most common minority variants across all three  
217 studies occurred in intergenic regions.

218 Median depth of coverage was significantly correlated with the total number of iSNVs detected  
219 outside the PE/PPE genes for the Walker et al. study, though no association was identified in the  
220 Colangeli et al. or Guthrie et al. studies (Fig. S2). Additionally, minor allele frequency was negatively  
221 correlated with site depth of coverage in the Colangeli et al. and the Walker et al. studies, but not Guthrie  
222 et al. (Fig. S2), potentially indicating that both culture method and sequencing depth were responsible for  
223 the observed differences in recovered variation (Table 1).

224

225 *Signatures of transmission in within-host M. tuberculosis variation.*

226 To test whether within-host variation could be used to identify potential transmission linkages, we  
227 quantified the number of shared minority variants passing quality, depth, and frequency thresholds  
228 between each pair of samples in each study. Isolates from household pairs shared more minority variants  
229  $\geq 1\%$  frequency and outside of PE/PPE genes than did randomly selected pairs of isolates in all three  
230 studies (mean 98 shared minority variants vs. 10; 0.8 vs. 0.2; and 0.7 vs. 0.2, respectively; all  $p < 0.001$ ,  
231 Wilcoxon) (Table 2; Fig. 3). This effect rapidly declines as the definition of minority variant becomes  
232 more stringent (Fig. S3). In each study, the distribution of shared minority variants differed significantly  
233 between epidemiologically unlinked isolate pairs and epidemiologically linked pairs (Fig. 4a).

234 In a general linear model, shared within-host variation  $\geq 1\%$  frequency and outside of PE/PPE  
235 genes was significantly associated with household membership (OR: 1.51 [1.30,1.71] for one standard  
236 deviation increase in shared minority variants. Genomic clustering, based on a standard 12-SNP  
237 clustering distance thresholds, was also significantly associated with household membership (OR: 3,670  
238 [1,160, 15,380]), with similar results when applying a 5-SNP clustering distance threshold. We measured

239 the performance of general linear models in classifying household pairs versus unlinked pairs with  
240 receiver operator characteristic (ROC) curves. Including shared within-host variation improved the  
241 accuracy of predictions in all three studies as compared to a model without within-host variation (AUC:  
242 0.95 *versus* 0.92, 0.99 *versus* 0.95, and 0.93 *versus* 0.91) (Fig. 4b). A model including within-host  
243 variation independently of consensus sequence-based clustering resulted in AUCs of 0.69, 0.64, and 0.64  
244 for each study (Fig. 4b).

245 A major challenge in studies of pathogen variation and within-host variation, is distinguishing  
246 true biological variation from errors introduced through sampling, sequencing, and bioinformatic  
247 identification of variation in sequence data. To assess tradeoffs in sensitivity and specificity in minority  
248 variant identification, we applied a series of increasingly conservative minor allele frequency thresholds,  
249 filtering variants below a 0.05% to 50% frequency. Maximum AUC for predicting household membership  
250 was 0.998 (minor allele frequency threshold: 2%) for the Colangeli et al. study, 0.996 (threshold: 5%) for  
251 the Guthrie et al. study, and 0.94 (threshold: 5%) for the Walker et al. study (Fig. S4).

252 Among epidemiologically unlinked pairs, shared iSNVs declined significantly with increased  
253 genetic distance between samples across all studies (Fig. S5). For household pairs, we did not find a  
254 significant correlation between the genetic distance between isolate consensus sequences and number of  
255 shared minority variants in the Colangeli et al. and Walker et al. studies (Fig. S5), suggesting that this  
256 relationship may not be linear. While we did find a positive correlation between genetic distance and  
257 shared iSNVs for the Guthrie et al. study, this was due to a single pair with a genetic distance of greater  
258 than 20 SNPs.

259 Allele frequencies of shared minority variants  $\geq 1\%$  frequency located outside of PE/PPE genes  
260 were correlated between isolates from household pairs in Colangeli et al. (Pearson's  $r=0.17$ ,  $p<0.001$ ) and  
261 Guthrie et al. ( $r=0.94$ ,  $p<0.001$ ), but not Walker et al. (Fig. S6). We predicted that sampling time might  
262 impact recovery of shared minority alleles because of changes in allele frequency between the time of  
263 sampling and time of transmission. Shared minority variation was negatively correlated with time  
264 between collection of isolates from household index cases and household members, though the

265 association was not significant in the Colangeli et al. study, which reported time between sampling (Fig.  
266 S7).

267

## 268 **Discussion**

269 To maximize the epidemiological information gleaned from the continuous evolution of *M.*  
270 *tuberculosis*, approaches to leverage biological variation more fully are needed. Here, we found that (1)  
271 within-host *M. tuberculosis* variation persists in sequence data from culture, (2) the magnitude of within-  
272 host variation varies between and within studies and is impacted by methodological choices, and (3) *M.*  
273 *tuberculosis* isolates from epidemiologically linked individuals share higher levels of variation than do  
274 unlinked individuals and shared within-host variation improves predictions of epidemiological linkage.  
275 Our results suggest that minority variation could contribute epidemiological information to transmission  
276 inferences, improving inferences from consensus sequences, and that alternative approaches to culture-  
277 based sequencing may further contribute to this observed epidemiological signal.

278 As sequencing has become more efficient and less expensive, pathogen genomic studies have  
279 begun to describe previously uncharacterized levels of minority variation within individual hosts and  
280 shared between transmission pairs. For example, *M. tuberculosis* within-host variation has been used to  
281 reveal an undetected superspreader event<sup>25,26</sup> in a single large outbreak in the Canadian Arctic. In another  
282 study, Goig et al. observed minority variants that were shared between epidemiologically linked  
283 individuals, and one example of isolates from a four-person transmission cluster that all shared a minority  
284 variant at different allele frequencies<sup>35</sup>. The existence of shared minority variants suggests that multiple  
285 variants present in a donor's infection persist through transmission and are maintained within the recipient  
286 through population changes and immune pressures. A similar observation has been made for other  
287 pathogens—shared within-host diversity of SARS-CoV-2 has been used to improve phylogenetic and  
288 transmission inferences in empirically collected and modeled sequence data<sup>61–63</sup>. Recently developed  
289 transmission inference approaches include pathogen within-host diversity to infer transmission events<sup>64–</sup>  
290 <sup>67</sup>, but have not yet been applied to *M. tuberculosis*, which is unique in its slow substitution rate and long

291 and variable periods of latent infection. Future work is needed to develop automated, user-friendly  
292 pipelines for transmission and phylogenetic inference that include both fixed genomic differences and  
293 within-host variation.

294 Our findings that within-host diversity persists through culture and is impacted by methodological  
295 choices underscore the further work needed to optimize approaches for highly accurate identification of  
296 within-host variation. Each step of generating sequence data, including clinical sampling, sample  
297 preparation, sequencing, bioinformatic pipeline, may introduce a bottleneck and/or bias the variation  
298 recovered. For example, our observation that minority variants are concentrated in PE/PPE genes,  
299 highlights the need for testing whether long read sequencing or alternative mapping approaches can  
300 improve the accuracy of variant identification in this region<sup>46</sup>. Further, we found that increased  
301 sequencing coverage and, potentially, culture approach, detect higher levels of within-host variation.

302 A major challenge in pathogen genomics, including studies of within-host pathogen variation, is  
303 in distinguishing true biological variation from noise introduced by sequencing, bioinformatic, or other  
304 errors. There are significant trade-offs between sensitivity and specificity in variant identification; often,  
305 pathogen genomic approaches err on the side of specificity and impose conservative variant filters. Our  
306 findings here and previously<sup>46</sup> suggest that for studying transmission linkages, including low frequency  
307 minority variants may improve predictions of transmission linkage. However, it is likely that some of the  
308 minority variants within individual samples and shared across samples are artefacts. For example, we  
309 found that some unlinked pairs of isolates share minority variants, potentially errors or true variants  
310 occurring at highly mutable sites (Fig. 3).

311 There are several limitations to our study. First, we conducted a re-analysis of previously  
312 published sequence data from clinical *M. tuberculosis* samples. We therefore do not have information  
313 about the true biological variation present within samples and cannot assess sensitivity and specificity of  
314 variants identified using alternative approaches. To measure performance of hybrid capture and other  
315 methods in recovering true within-host variation and the limit of detection of within-host variation,  
316 experiments that directly compare recovery of minority variants in known strain mixtures are required.

317 Second, we found that one study found substantially higher within-host variation than the others, likely  
318 reflecting large differences in study design and sample preparation (Table 1). The Colangeli et al. was a  
319 prospective study, and included three loops of culture for DNA extractions, while the Guthrie et al. and  
320 Walker et al. studies were retrospective and re-cultured isolates after frozen storage. This difference could  
321 also reflect higher population-wide *M. tuberculosis* diversity circulating in a higher-incidence setting. It is  
322 possible that other steps in *M. tuberculosis* sampling, sampling time (i.e. Fig. S5), culture, laboratory  
323 preparation, or sequencing influenced recovered within-host variation; if these steps were not reported,  
324 we were not able to include them in our models of within-host variation. For example, data on sequencing  
325 run, a potential source of false shared variation, was not available. Third, we considered household  
326 transmission pairs as our gold standard for transmission linkages. While the studies we included  
327 employed additional filters to exclude household pairs unlikely to be epidemiologically linked, it is  
328 possible that these pairs are misclassified. However, the impact of such misclassification would be to bias  
329 our results towards the null finding that shared minority variants are not more likely to be found in  
330 transmission pairs than unlinked pairs. Finally, we do not have access to sequencing replicates of the  
331 same sputum culture or biological replicates of the same sputum to quantify the concordance of minority  
332 variants across sequencing or biological replicates.

333 Our findings of within-host variation present in cultured *M. tuberculosis* samples suggests that  
334 within-host *M. tuberculosis* variation may be able to augment routine transmission inferences. More  
335 broadly, these finding suggests that assessing *M. tuberculosis* variation more broadly, including not only  
336 within-host variants, but also genome-wide variants and indels may yield more information and improve  
337 both transmission and phylogenetic inferences.

338

### 339 **Declaration of interest**

340 The authors report no conflict of interest.

341

342

343 **Table 1. *M. tuberculosis* household transmission study characteristics.** TB incidence per 100,000 is  
 344 from the World Health Organization 2022 Country Profiles unless otherwise noted.  
 345

| Study                                        | Colangeli et al. (2020)                                                                                                                                   | Guthrie et al. (2018)                                                                                      | Walker et al. (2014)                                                                                                                                                                                            |
|----------------------------------------------|-----------------------------------------------------------------------------------------------------------------------------------------------------------|------------------------------------------------------------------------------------------------------------|-----------------------------------------------------------------------------------------------------------------------------------------------------------------------------------------------------------------|
| <b>Location</b>                              | Vitória, Brazil                                                                                                                                           | BC, Canada                                                                                                 | Oxfordshire, England                                                                                                                                                                                            |
| <b>Sample size</b>                           | 48 (24 pairs)                                                                                                                                             | 253 (11 pairs)                                                                                             |                                                                                                                                                                                                                 |
|                                              |                                                                                                                                                           | (26 pairs)                                                                                                 |                                                                                                                                                                                                                 |
|                                              |                                                                                                                                                           | (13 pairs)                                                                                                 |                                                                                                                                                                                                                 |
|                                              |                                                                                                                                                           | (pairs)                                                                                                    |                                                                                                                                                                                                                 |
| <b>TB incidence per 100,000 person-years</b> | 49                                                                                                                                                        | 5.7                                                                                                        | 8.4 (reported in study)                                                                                                                                                                                         |
| <b>Study design</b>                          | - Prospective household transmission study<br>- Index smear + TB cases & household enrolled, followed prospectively to identify secondary cases.          | - Retrospective study<br>- Included pediatric cases of TB & household members.                             | - Retrospective study<br>- All Oxfordshire residents with an <i>M. tuberculosis</i> culture or clinical TB diagnosis from 2007-2012.<br>- TB nurses identified epidemiological linkages: shared space and time. |
| <b>Culture</b>                               | - Isolates cultured on LJ slants.<br>- Each strain plated on Middlebrook 7H10 agar.<br>- Three loops of culture were scraped and suspended in SET buffer. | - Isolates revived from frozen archival stocks on Lowenstein-Jensen (LJ) slants or in MGIT™ liquid medium. | - Cultures obtained from frozen archival stocks.<br>- All cultures were grown in MGIT containing modified Middlebrooks 7H9 liquid medium and on LJ agar.                                                        |
| <b>DNA extraction</b>                        | - Phenol-chloroform DNA extraction.                                                                                                                       | - MagMA Total Nucleic Acid Isolation Kit DNA extraction.                                                   | - Mechanical disruption with Fastprep homogeniser and Lysing Matrix B; extraction and purification with Fuji Quickgene kit.                                                                                     |
| <b>Sequencing</b>                            | 2 lanes on an Illumina HiSeq 2500                                                                                                                         | Illumina HiSeqX                                                                                            | Illumina HiSeq                                                                                                                                                                                                  |
| <b>Median sample depth</b>                   | 447X                                                                                                                                                      | 146X                                                                                                       | 103X                                                                                                                                                                                                            |
| <b>Accession number</b>                      | PRJNA475130                                                                                                                                               | PRJNA413593                                                                                                | PRJNA549270                                                                                                                                                                                                     |

346  
347

348 **Table 2. Measured within-host *M. tuberculosis* variation.** Per-sample and shared minority variants  
349 across pairwise comparisons with different epidemiological linkages, including minority variants  $\geq 1\%$   
350 allele frequency, outside of the PE/PPE genes, and within an expected depth (defined in Methods).  
351

| Comparison type | mean   | median | lower | upper |
|-----------------|--------|--------|-------|-------|
| Colangeli       |        |        |       |       |
| Sample          | 170.00 | 160    | 130   | 220.0 |
| Household       | 98.00  | 95     | 64    | 130.0 |
| Unlinked        | 9.80   | 1      | 0     | 7.0   |
| Guthrie         |        |        |       |       |
| Sample          | 5.80   | 3      | 1     | 8.0   |
| Household       | 0.80   | 1      | 0     | 1.0   |
| Unlinked        | 0.15   | 0      | 0     | 0.0   |
| Walker          |        |        |       |       |
| Sample          | 7.10   | 2      | 1     | 4.0   |
| Household       | 0.73   | 0      | 0     | 1.5   |
| Unlinked        | 0.17   | 0      | 0     | 0.0   |

352  
353



354 **Figure 1. *M. tuberculosis* consensus genomes are closely related but are not always predictive of**  
355 **epidemiological linkage.** (a) Histograms indicate pairwise genetic distances between *M. tuberculosis*  
356 consensus genomes, with facets indicating study and pairwise comparison type. (b) Phylogeny of  
357 consensus sequences for each study, with branch tips colored to indicate samples from a single household  
358 or with known epidemiologic links.  
359

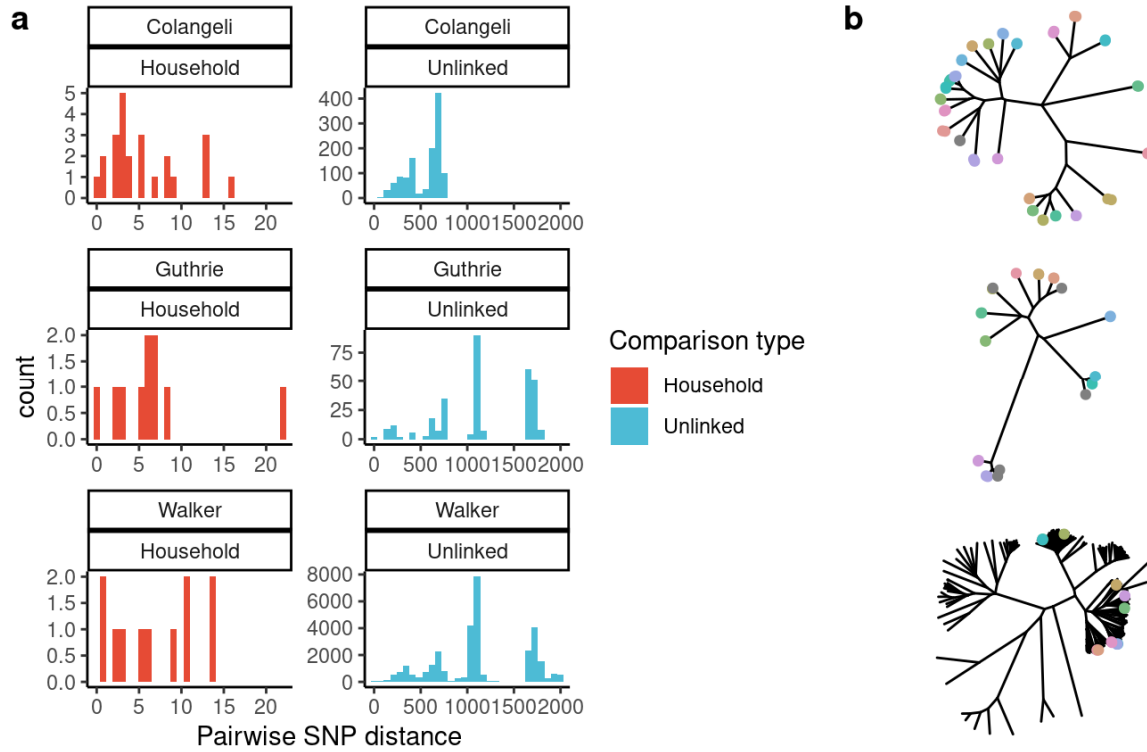

360  
361

362 **Figure 2. Limited *M. tuberculosis* within-host diversity is recovered with culture-based Illumina**  
363 **sequencing.** Ridgeline plot of the minor allele frequency distribution for five randomly selected samples  
364 from each study, indicated by ridge color. Panels indicate genomic region: outside PE/PPE genes and  
365 within PE/PPE genes.

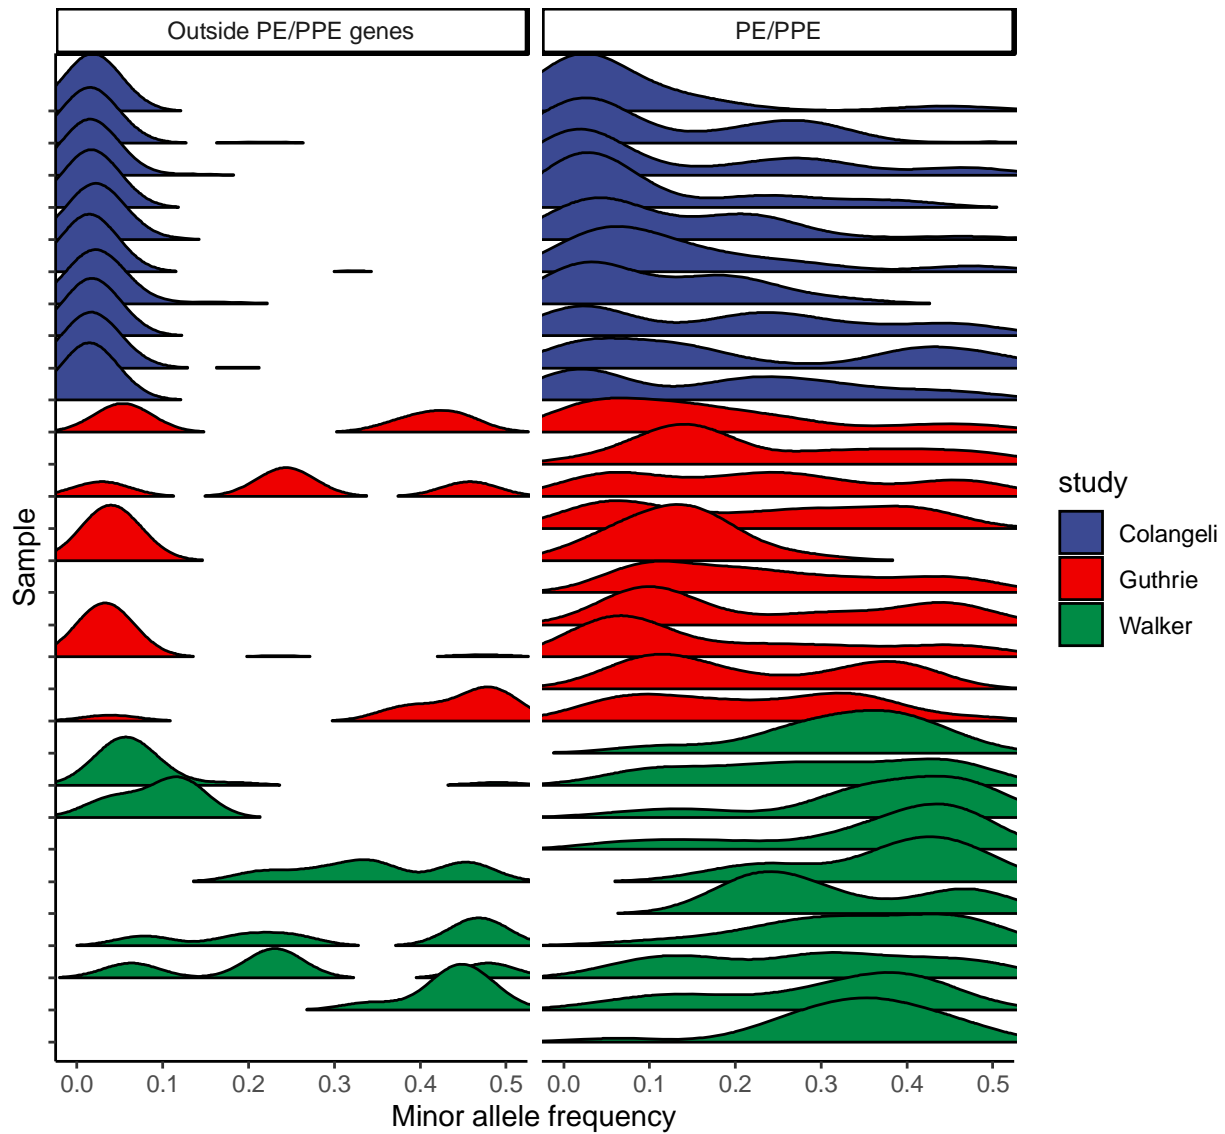

366  
367

368 **Figure 3. Pairwise shared variants above a 1% minor allele frequency.** Boxplots of the number of  
369 high-quality shared minority variants between sample pairs in three previously published *M. tuberculosis*  
370 transmission studies (columns) with jittered points indicating pairwise observations. Colors indicate  
371 comparison type: sample, within-host minority variants; household, minority variants shared between  
372 household pairs; unlinked, minority variants shared between individuals in different households. Boxes  
373 indicate group interquartile ranges and center lines indicate group medians.  
374

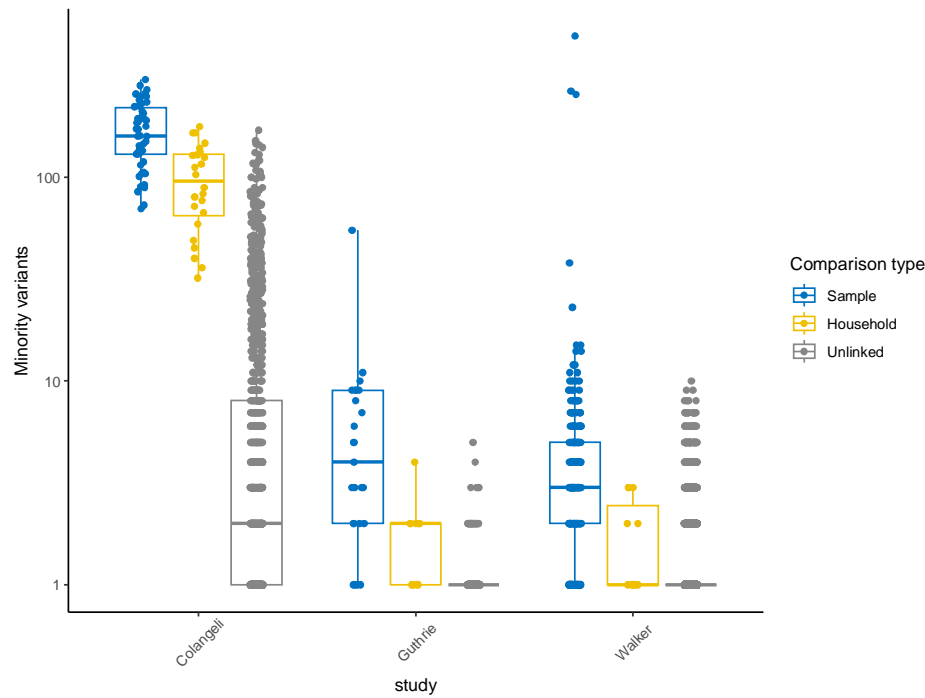

375

376 **Figure 4. Shared minority variants contain information about household membership.** (a) Stacked  
377 barplot showing the proportion of sample pairs across different levels of shared minority variants  $\geq 1\%$   
378 minor allele frequency threshold. Panels indicate study. (b) ROC curves showing sensitivity (true positive  
379 rate) as a function  $1 - \text{specificity}$  (true negative rate) for predicting household membership in general  
380 linear models that include both shared iSNVs and consensus sequence-based clusters (Full model),  
381 consensus sequence-based cluster only (Consensus sequences), and Shared iSNVs only (Shared iSNVs).  
382 All models include study as a predictor.  
383  
384  
385  
386  
387

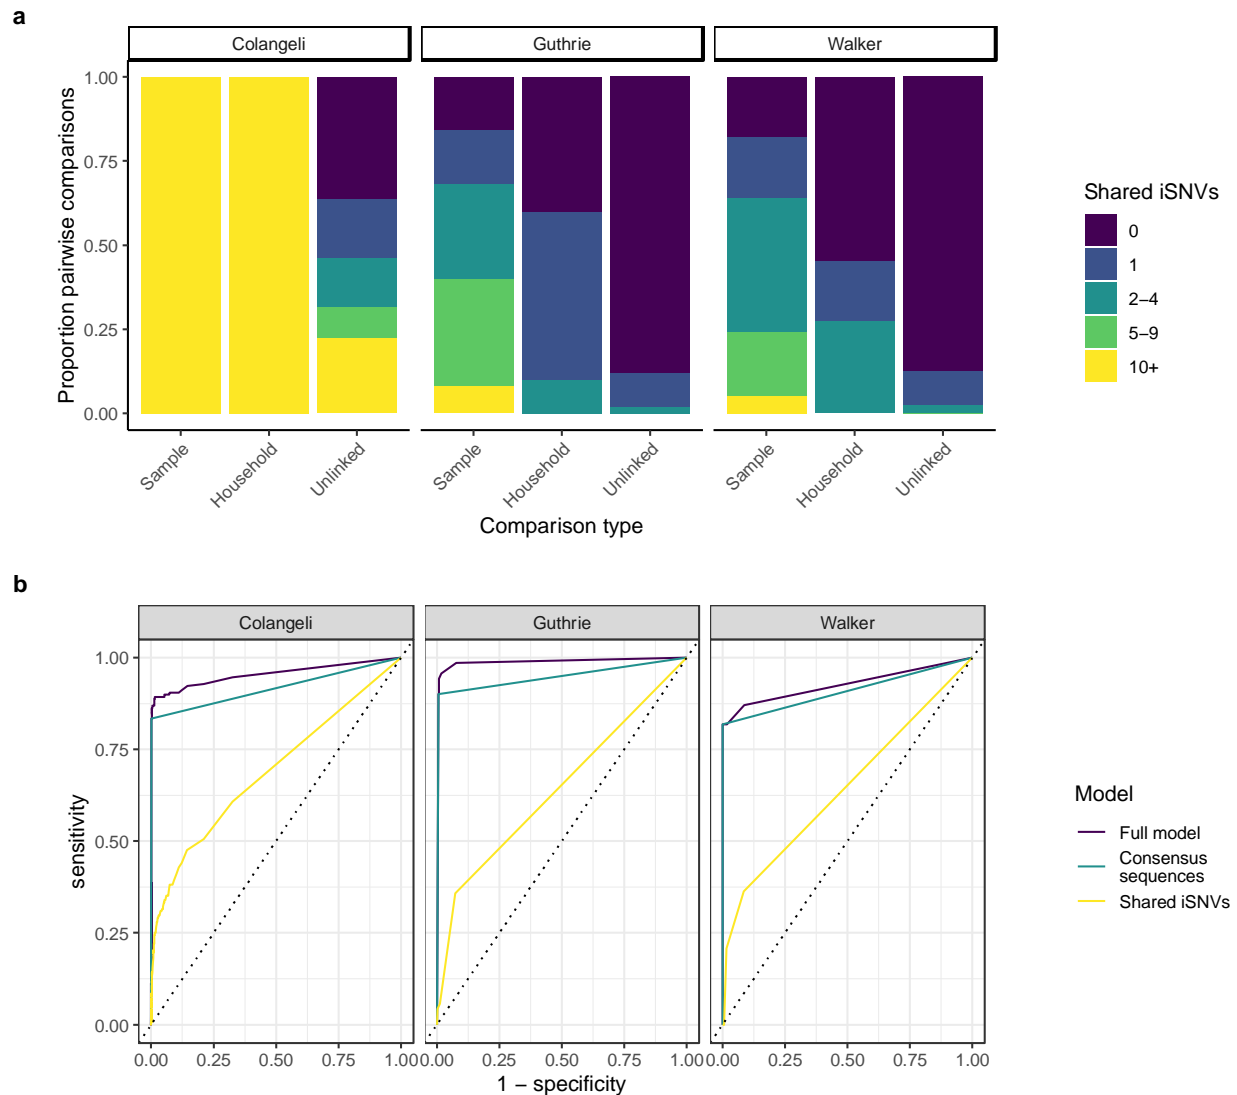

388

389 **References**

- 390
- 391 1. Churchyard, G. *et al.* What We Know about Tuberculosis Transmission: An Overview. *Journal of*  
392 *Infectious Diseases* **216**, S629–S635 (2017).
- 393 2. Auld, S. C. *et al.* Extensively drug-resistant tuberculosis in South Africa: Genomic evidence  
394 supporting transmission in communities. *European Respiratory Journal* **52**, (2018).
- 395 3. Middelkoop, K. *et al.* Transmission of tuberculosis in a south African community with a high  
396 prevalence of HIV infection. *Journal of Infectious Diseases* **211**, 53–61 (2015).
- 397 4. Andrews, J. R., Morrow, C., Walensky, R. P. & Wood, R. Integrating social contact and  
398 environmental data in evaluating tuberculosis transmission in a South African township. *J Infect*  
399 *Dis* **210**, 597–603 (2014).
- 400 5. Yates, T. A. *et al.* The transmission of Mycobacterium tuberculosis in high burden settings. *Lancet*  
401 *Infect Dis* **16**, 227–238 (2016).
- 402 6. Andrews, J. R., Morrow, C. & Wood, R. Modeling the role of public transportation in sustaining  
403 tuberculosis transmission in South Africa. *Am J Epidemiol* **177**, 556–561 (2013).
- 404 7. Ypma, R. J. F., Altes, H. K., Van Soolingen, D., Wallinga, J. & Marijn Van Ballegooijen, W. A  
405 Sign of Superspreading in Tuberculosis: Highly Skewed Distribution of Genotypic Cluster Sizes.  
406 *Source: Epidemiology* **24**, 395–400 (2013).
- 407 8. Gygli, S. M. *et al.* Prisons as ecological drivers of fitness-compensated multidrug-resistant  
408 Mycobacterium tuberculosis. *Nat Med* **27**, 1171–1177 (2021).
- 409 9. Xu, Y. *et al.* High-resolution mapping of tuberculosis transmission: Whole genome sequencing  
410 and phylogenetic modelling of a cohort from Valencia Region, Spain. *PLoS Med* **16**, (2019).
- 411 10. PHE. Tuberculosis in England: 2018 Presenting data to end of 2017. *Public Health England*  
412 **Version 1.**, 173 (2018).
- 413 11. Walker, T. M. *et al.* Assessment of Mycobacterium tuberculosis transmission in Oxfordshire, UK,  
414 2007–12, with whole pathogen genome sequences: An observational study. *Lancet Respir Med* **2**,  
415 285–292 (2014).
- 416 12. Bryant, J. M. *et al.* Inferring patient to patient transmission of Mycobacterium tuberculosis from  
417 whole genome sequencing data. *BMC Infect Dis* **13**, 1–12 (2013).
- 418 13. Guerra-Assunção, J. *et al.* Large-scale whole genome sequencing of M. tuberculosis provides  
419 insights into transmission in a high prevalence area. *Elife* **4**, 1–17 (2015).
- 420 14. Menardo, F., Duchêne, S., Brites, D. & Gagneux, S. The molecular clock of mycobacterium  
421 tuberculosis. *PLoS Pathog* **15**, (2019).
- 422 15. Casali, N. *et al.* Evolution and transmission of drug-resistant tuberculosis in a Russian population.  
423 *Nat Genet* **46**, 279–286 (2014).
- 424 16. Roetzer, A. *et al.* Whole Genome Sequencing versus Traditional Genotyping for Investigation of a  
425 Mycobacterium tuberculosis Outbreak: A Longitudinal Molecular Epidemiological Study. *PLoS*  
426 *Med* **10**, (2013).
- 427 17. Yang, C. *et al.* Internal migration and transmission dynamics of tuberculosis in Shanghai, China:  
428 an epidemiological, spatial, genomic analysis. *Lancet Infect Dis* **18**, 788–795 (2018).
- 429 18. Borges, V. *et al.* Nosocomial Outbreak of SARS-CoV-2 in a “Non-COVID-19” Hospital Ward:  
430 Virus Genome Sequencing as a Key Tool to Understand Cryptic Transmission. *Viruses* **13**, (2021).
- 431 19. Cohen, T. *et al.* Mixed-Strain Mycobacterium tuberculosis Infections and the Implications for  
432 Tuberculosis Treatment and Control. *Clin Microbiol Rev* **25**, 708–719 (2012).
- 433 20. Cohen, T. *et al.* Within-host heterogeneity of mycobacterium tuberculosis infection is associated  
434 with poor early treatment response: A prospective cohort study. *Journal of Infectious Diseases*  
435 **213**, 1796–1799 (2016).
- 436 21. Pérez-Lago, L. *et al.* Revealing hidden clonal complexity in Mycobacterium tuberculosis infection  
437 by qualitative and quantitative improvement of sampling. *Clinical Microbiology and Infection* **21**,  
438 147.e1-147.e7 (2015).

- 439 22. Lieberman, T. D. *et al.* Genomic diversity in autopsy samples reveals within-host dissemination of  
440 HIV-associated Mycobacterium tuberculosis. *Nat Med* **22**, 1470–1474 (2016).
- 441 23. Mann, B. C., Jacobson, K. R., Ghebrekristos, Y., Warren, R. M. & Farhat, M. R. Assessment and  
442 validation of enrichment and target capture approaches to improve Mycobacterium tuberculosis  
443 WGS from direct patient samples. *J Clin Microbiol* **61**, (2023).
- 444 24. Séraphin, M. N. *et al.* Direct transmission of within-host Mycobacterium tuberculosis diversity to  
445 secondary cases can lead to variable between-host heterogeneity without de novo mutation: A  
446 genomic investigation. *EBioMedicine* **47**, 293–300 (2019).
- 447 25. Lee, R. S., Proulx, J.-F. F., McIntosh, F., Behr, M. A. & Hanage, W. P. Previously undetected  
448 super-spreading of mycobacterium tuberculosis revealed by deep sequencing. *Elife* **9**, (2020).
- 449 26. Martin, M. A., Lee, R. S., Cowley, L. A., Gardy, J. L. & Hanage, W. P. Within-host  
450 mycobacterium tuberculosis diversity and its utility for inferences of transmission. *Microb Genom*  
451 **4**, (2018).
- 452 27. Zetola, N. M. *et al.* Mixed Mycobacterium tuberculosis complex infections and false-negative  
453 results for rifampin resistance by genexpert MTB/RIF are associated with poor clinical outcomes.  
454 *J Clin Microbiol* **52**, 2422–2429 (2014).
- 455 28. Meehan, C. J. *et al.* Whole genome sequencing of Mycobacterium tuberculosis: current standards  
456 and open issues. *Nat Rev Microbiol* **17**, 533–545 (2019).
- 457 29. McNerney, R. *et al.* Removing the bottleneck in whole genome sequencing of Mycobacterium  
458 tuberculosis for rapid drug resistance analysis: a call to action. *International Journal of Infectious*  
459 *Diseases* vol. 56 130–135 Preprint at <https://doi.org/10.1016/j.ijid.2016.11.422> (2017).
- 460 30. Martín, A., Herranz, M., Ruiz Serrano, M. J., Bouza, E. & García de Viedma, D. The clonal  
461 composition of Mycobacterium tuberculosis in clinical specimens could be modified by culture.  
462 *Tuberculosis* **90**, 201–207 (2010).
- 463 31. Plazzotta, G., Cohen, T. & Colijn, C. Magnitude and sources of bias in the detection of mixed  
464 strain M. tuberculosis infection. *J Theor Biol* **368**, 67–73 (2015).
- 465 32. Walter, K. S. *et al.* Genomic variant-identification methods may alter mycobacterium tuberculosis  
466 transmission inferences. *Microb Genom* **6**, 1–16 (2020).
- 467 33. Ates, L. S. New insights into the mycobacterial PE and PPE proteins provide a framework for  
468 future research. *Mol Microbiol* 0–2 (2019) doi:10.1111/mmi.14409.
- 469 34. Phelan, J. E. *et al.* Recombination in pe/ppe genes contributes to genetic variation in  
470 Mycobacterium tuberculosis lineages. *BMC Genomics* **17**, 1–12 (2016).
- 471 35. Goig, G. A. *et al.* Whole-genome sequencing of Mycobacterium tuberculosis directly from clinical  
472 samples for high-resolution genomic epidemiology and drug resistance surveillance: an  
473 observational study. *Lancet Microbe* **1**, e175–e183 (2020).
- 474 36. Brown, A. C. *et al.* Rapid whole-genome sequencing of mycobacterium tuberculosis isolates  
475 directly from clinical samples. *J Clin Microbiol* **53**, 2230–2237 (2015).
- 476 37. Votintseva, A. A. *et al.* Same-day diagnostic and surveillance data for tuberculosis via whole-  
477 genome sequencing of direct respiratory samples. *J Clin Microbiol* **55**, 1285–1298 (2017).
- 478 38. Nimmo, C. *et al.* Whole genome sequencing Mycobacterium tuberculosis directly from sputum  
479 identifies more genetic diversity than sequencing from culture. *BMC Genomics* **20**, 1–9 (2019).
- 480 39. Doyle, R. M. *et al.* Direct Whole-Genome Sequencing of Sputum Accurately Identifies Drug-  
481 Resistant Mycobacterium tuberculosis Faster than MGIT Culture Sequencing. *J Clin Microbiol* **56**,  
482 666–684 (2018).
- 483 40. Colangeli, R. *et al.* Mycobacterium tuberculosis progresses through two phases of latent infection  
484 in humans. *Nat Commun* **11**, (2020).
- 485 41. Guthrie, J. L. *et al.* Genotyping and Whole-Genome Sequencing to Identify Tuberculosis  
486 Transmission to Pediatric Patients in British Columbia, Canada, 2005-2014. *J Infect Dis* **218**,  
487 1155–1163 (2018).
- 488 42. Walter, K. S. *et al.* The role of prisons in disseminating tuberculosis in Brazil: A genomic  
489 epidemiology study. *Lancet Regional Health - Americas* **9**, 100186 (2022).

- 490 43. Li, H. & Durbin, R. Fast and accurate short read alignment with Burrows-Wheeler transform.  
491 *Bioinformatics* **25**, 1754–1760 (2009).
- 492 44. Van der Auwera, G. A. & O’Connor, B. *Genomics in the cloud* □: using Docker, GATK, and WDL  
493 in Terra. *Genomics in the cloud* □: using Docker, GATK, and WDL in Terra (O’Reilly Media,  
494 2020).
- 495 45. Van der Auwera, G. A. *et al.* From FastQ Data to High-Confidence Variant Calls: The Genome  
496 Analysis Toolkit Best Practices Pipeline. in *Current Protocols in Bioinformatics* vol. 43 11.10.1-  
497 11.10.33 (John Wiley & Sons, Inc., 2013).
- 498 46. Walter, K. S. *et al.* Genomic variant-identification methods may alter Mycobacterium tuberculosis  
499 transmission inferences. *Microb Genom* **6**, (2020).
- 500 47. Krueger, F. Trim Galore. Preprint at (2019).
- 501 48. Martin, M. Cutadapt Removes Adapter Sequences From High-Throughput Sequencing Reads.  
502 *EMBnet J* **17**, (2011).
- 503 49. Goig, G. A., Blanco, S., Garcia-Basteiro, A. L. & Comas, I. Contaminant DNA in bacterial  
504 sequencing experiments is a major source of false genetic variability. *BMC Biol* **18**, (2020).
- 505 50. Wood, D. E. & Salzberg, S. L. Kraken: Ultrafast metagenomic sequence classification using exact  
506 alignments. *Genome Biol* **15**, R46 (2014).
- 507 51. Tarasov, A., Vilella, A. J., Cuppen, E., Nijman, I. J. & Prins, P. Sambamba: fast processing of  
508 NGS alignment formats. *Bioinformatics* **31**, 2032–2034 (2015).
- 509 52. Danecek, P. *et al.* Twelve years of SAMtools and BCFtools. *Gigascience* **10**, 1–4 (2021).
- 510 53. Brites, D. *et al.* A new phylogenetic framework for the animal-adapted mycobacterium  
511 tuberculosis complex. *Front Microbiol* **9**, 2820 (2018).
- 512 54. Phelan, J. E. *et al.* Integrating informatics tools and portable sequencing technology for rapid  
513 detection of resistance to anti-tuberculous drugs. *Genome Med* **11**, 41 (2019).
- 514 55. Coll, F. *et al.* Rapid determination of anti-tuberculosis drug resistance from whole-genome  
515 sequences. *Genome Med* **7**, (2015).
- 516 56. Page, A. J. *et al.* SNP-sites: rapid efficient extraction of SNPs from multi-FASTA alignments.  
517 *Microb Genom* **2**, 1–5 (2016).
- 518 57. Paradis, E. & Schliep, K. Ape 5.0: An environment for modern phylogenetics and evolutionary  
519 analyses in R. *Bioinformatics* **35**, 526–528 (2019).
- 520 58. Kalyaanamoorthy, S., Minh, B. Q., Wong, T. K. F., Von Haeseler, A. & Jermin, L. S.  
521 modelfinder: fast model selection for accurate phylogenetic estimates. **14**, (2017).
- 522 59. Minh, B. Q. *et al.* IQ-TREE 2: New Models and Efficient Methods for Phylogenetic Inference in  
523 the Genomic Era. *Mol Biol Evol* **37**, 1530–1534 (2020).
- 524 60. Hoang, D. T., Chernomor, O., Von Haeseler, A., Minh, B. Q. & Vinh, L. S. UFBoot2: Improving  
525 the Ultrafast Bootstrap Approximation. *Mol Biol Evol* **35**, 518–522 (2018).
- 526 61. Torres Ortiz, A. *et al.* Within-host diversity improves phylogenetic and transmission  
527 reconstruction of SARS-CoV-2 outbreaks. doi:10.7554/eLife.
- 528 62. Walter, K. S. *et al.* Challenges in Harnessing Shared Within-Host Severe Acute Respiratory  
529 Syndrome Coronavirus 2 Variation for Transmission Inference. *Open Forum Infect Dis* **10**, (2023).
- 530 63. Siddle, K. J. *et al.* Transmission from vaccinated individuals in a large SARS-CoV-2 Delta variant  
531 outbreak. *Cell* **185**, 485-492.e10 (2022).
- 532 64. De Maio, N., Wu, C. H. & Wilson, D. J. SCOTTI: Efficient Reconstruction of Transmission  
533 within Outbreaks with the Structured Coalescent. *PLoS Comput Biol* **12**, e1005130 (2016).
- 534 65. De Maio, N., Worby, C. J., Wilson, D. J. & Stoesser, N. Bayesian reconstruction of transmission  
535 within outbreaks using genomic variants. *PLoS Comput Biol* **14**, e1006117 (2018).
- 536 66. Wymant, C. *et al.* PHYLOSCANNER: Inferring transmission from within- and between-host  
537 pathogen genetic diversity. *Mol Biol Evol* **35**, 719–733 (2018).
- 538 67. Worby, C. J., Lipsitch, M. & Hanage, W. P. Shared Genomic Variants: Identification of  
539 Transmission Routes Using Pathogen Deep-Sequence Data. *Am J Epidemiol* **186**, 1209–1216  
540 (2017).
